# Supplementary material
Source: publisher site journal article supplement (https://www.dovepress.com/get_supplementary_file.php?f=498728.docx)
Supplement: Supplementary file 1 [file get_supplementary_file.php]

STable 1 Comparison of baseline data characteristics between the two groups

|  | Study group（n=39） | Control group（n=40） | | *P* | | | |
| --- | --- | --- | --- | --- | --- | --- | --- |
| Gender |  |  | 0.934 | | | |
| Male (n, % ) | 14 (35.90) | 14 (35.00) |  | | | |
| Female (n, % ) | 25 (64.10) | 26 (65.00) |  | | | |
| Age | 46.90±9.55(years) | 46.95±9.56(years) | 0.875 | | | |
| Course of disease | 16.15±13.27(months) | 13.150±13.78(months) | 0.815 | | |
| Height | 163.31±1.27(cm) | 162.95±1.03(cm) | 0.325 | | |
| Weight | 60.28±1.48(kg) | 60.43±1.24(kg) | 0.716 | | |
| ROM |  |  | | |  | | | |
| Flexion | 27.22±1.17° | 20.02±1.13° | 0.644 | | |
| Extension | 23.53±1.10° | 24.56±1.42° | 0.051 | | |
| Neutral | 20.37±1.41° | 14.65±1.20° | 0.592 | | |

Note: The range of cervical joints (ROM) was measured according to the X-ray scan of cervical spine.[24]

STable2 Comparison of the scoring indicators between the two groups（Mean±SD）

|  | Change from baseline score (95% CI) | | | | ta | | *Pa* | | tb | | | *Pb* | | tc | | *Pc* | | | |
| --- | --- | --- | --- | --- | --- | --- | --- | --- | --- | --- | --- | --- | --- | --- | --- | --- | --- | --- | --- |
|  | Pre- Post | Pre- Follow up | Post- Follow up | Pre- Post | | | | | | Pre- Follow up | | | | | Post- Follow up | | | |
| VAS |  |  |  |  | |  | |  | | |  | |  | | | |  |
| Study group | [3.870, 4.335] | [3.870, 4.335] | [-0.197, 0.197] | 35.683 | | 0.000 | | 35.683 | | | 0.000 | | 0.000 | | | | 1.000 |
| Control group | [2.499, 3.051] | [2.602, 3.148] | [-0.041, 0.241] | 20.362 | | 0.000 | | 21.317 | | | 0.000 | | 1.433 | | | | 0.160 |
| NPQ |  |  |  |  | |  | |  | | |  | |  | | | |  |
| Study group | [11.998, 15.067] | [12.521, 15.399] | [-0.059, 0.913] | 14.978 | | 0.000 | | 14.311 | | | 0.000 | | 1.780 | | | | 0.083 |
| Control group | [8.349, 10.956] | [8.289, 11.017] | [-0.284, 0.284] | -5.551 | | 0.000 | | -5.552 | | | 0.000 | | 0.000 | | | | 1.000 |
| NDI |  |  |  |  | |  | |  | | |  | |  | | | |  |
| Study group | [8.925, 10.436] | [8.508, 9.988] | [-0.759, -0.108] | 25.941 | | 0.000 | | 25.289 | | | 0.000 | | -2.693 | | | | 0.010 |
| Control group | [6.090, 7.253] | [5.938, 7.073] | [-0.513, -0.180] | 23.208 | | 0.000 | | 23.172 | | | 0.000 | | 0.974 | | | | 0.336 |
| TY |  |  |  |  | |  | |  | | |  | |  | | | |  |
| Study group | [-4.074, -3.413] | [-4.058, -3.378] | [-0.132, -0.183] | -22.949 | | 0.000 | | -22.112 | | | 0.000 | | -0.330 | | | | 0.744 |
| Control group | [-3.846, -2.907] | [-3.791, -2.859] | [-0.094, 0.194] | -14.599 | | 0.000 | | -14.435 | | | 0.000 | | 0.703 | | | | 0.486 |
| Numbness |  |  |  |  | |  | |  | | |  | |  | | | |  |
| Study group | [0.508, 0.928] | [0.370, 0.809] | [-0.238, -0.018] | 6.932 | | 0.000 | | 5.437 | | | 0.000 | | -2.364 | | | | 0.023 |
| Control group | [0.241, 0.559] | [0.313, 0.637] | [-0.010, -0.160] | 5.099 | | 0.000 | | 5.940 | | | 0.000 | | 1.778 | | | | 0.083 |
| SF-36 total score |  |  |  |  | |  | |  | | |  | |  | | | |  |
| Study group | [-89.141, -79.969] | [-93.111, -84.717] | [-5.873, -2.845] | -37.326 | | 0.000 | | -42.888 | | | 0.000 | | -5.828 | | | | 0.000 |
| Control group | [-70.577, -61.255] | [-72.440, -63.592] | [-3.573, -0.627] | -28.605 | | 0.000 | | -31.098 | | | 0.000 | | -2.883 | | | | 0.006 |

Note: aComparative pre- and post-treatment results in the same group，bComparative pre- and follow-up-treatment results in the same group，cComparative post-and follow-up-treatment results in the same group.

STable3 Comparison of SF-36 scoring indicators between the two groups（Mean±SD）

|  | Change from baseline score (95% CI) | | | ta | *Pa* | tb | *Pb* | tc | *Pc* |
| --- | --- | --- | --- | --- | --- | --- | --- | --- | --- |
|  | Pre- Post | Pre- Follow up | Post- Follow up | Pre- Post | | Pre- Follow up | | Post- Follow up | |
| Physical functioning |  |  |  |  |  |  |  |  |  |
| Study group | [-4.335, -3.563] | [-4.160, -3.481] | [-0.057, 0.313] | -20.706 | 0.000 | -22.764 | 0.000 | 1.404 | 0.168 |
| Control group | [-3.740, -2.760] | [-3.687, -2.713] | [-0.094, 0.194] | -13.419 | 0.000 | -13.293 | 0.000 | 0.703 | 0.486 |
| Role-physical |  |  |  |  |  |  |  |  |  |
| Study group | [-5.943, -4.980] | [-5.423, -4.629] | [0.150, 0.722] | -22.982 | 0.000 | -25.632 | 0.000 | 3.085 | 0.004 |
| Control group | [-4.243, -3.157] | [-3.578, -2.772] | [0.226, 0.824] | -13.784 | 0.000 | -15.955 | 0.000 | 3.557 | 0.001 |
| Bodily pain |  |  |  |  |  |  |  |  |  |
| Study group | [-37.549, -31.426] | [-37.241, -31.221] | [-0.856, 1.369] | -22.803 | 0.000 | -23.020 | 0.000 | 0.467 | 0.643 |
| Control group | [-32.144, -25.606] | [-30.800, -24.700] | [-0.115, 2.405] | -17.867 | 0.000 | -18.402 | 0.000 | 1.778 | 0.083 |
| General health |  |  |  |  |  |  |  |  |  |
| Study group | [-5.132, -4.304] | [-4.869, -4.259] | [-0.036, 0.344] | -23.086 | 0.000 | -30.316 | 0.000 | 1.638 | 0.110 |
| Control group | [-3.665, -2.885] | [-3.598, -2.852] | [-0.021, 0.121] | -16.988 | 0.000 | -17.501 | 0.000 | 1.433 | 0.160 |
| Vitality |  |  |  |  |  |  |  |  |  |
| Study group | [-6.979, -4.331] | [-6.716, -4.259] | [-0.011, 0.164] | -9.137 | 0.000 | -9.042 | 0.000 | 1.780 | 0.083 |
| Control group | [-2.918, 0.318] | [-2.908, 0.308] | [-0.072, 0.072] | -1.625 | 0.112 | -1.635 | 0.110 | 0.000 | 1.000 |
| Social functioning |  |  |  |  |  |  |  |  |  |
| Study group | [-11.860, -7.097] | [-12.747, -7.748] | [-1.318, -0.220] | -8.057 | 0.000 | -8.300 | 0.000 | -2.837 | 0.007 |
| Control group | [-7.299, -4.034] | [-7.551, -4.180] | [-0.431, 0.031] | -7.020 | 0.000 | -7.040 | 0.000 | -1.749 | 0.088 |
| Role emotional |  |  |  |  |  |  |  |  |  |
| Study group | [-6.714, -6.106] | [-10.891, -10.135] | [-4.335, -3.870] | -42.677 | 0.000 | -56.262 | 0.000 | -35.683 | 0.000 |
| Control group | [-6.519, -5.931] | [-9.469, -8.531] | [-3.051, -2.499] | -42.816 | 0.000 | -38.785 | 0.000 | -20.362 | 0.000 |
| Mental health |  |  |  |  |  |  |  |  |  |
| Study group | [-14.939, -14.036] | [-15.481, -14.570] | [-0.733, -0.344] | -64.945 | 0.000 | -66.804 | 0.000 | -5.602 | 0.000 |
| Control group | [-14.411, -12.839] | [-15.253, -13.747] | [-1.004, -0.746] | -35.077 | 0.000 | -38.968 | 0.000 | -13.688 | 0.000 |
| Health transition |  |  |  |  |  |  |  |  |  |
| Study group | [-16.411, -5.384] | [-9.696, -1.842] | [2.090, 0.897] | -4.001 | 0.000 | -2.974 | 0.005 | 2.454 | 0.019 |
| Control group | [-6.641, -0.859] | [-6.991, -1.009] | [-0.603, -0.103] | -2.623 | 0.012 | -2.705 | 0.010 | -1.433 | 0.160 |

Note: aComparative pre- and post-treatment results in the same group，bComparative pre- and follow-up-treatment results in the same group，cComparative post-and follow-up-treatment results in the same group.
